# Supplementary material
Source: PubMed Central journal article supplement (PMC4386332)
Supplement: pnas.1421587112.sd01.pdf [file pnas.1421587112.sd01.pdf]

WT GCTTTTAATCTGTGGTGTGGAGAAGTCTCTTGAGAGTCCCTTGGACTGCAAGGAGATCCAACCAGTCCA  
BFF1 GCTTTTAATCTGTGGTGTGGAGAAGTCTCTTGAGAGTCCCTTGGACTGCAAGGAGATCCAACCAGTCCA  
BFF2 GCTTTTAATCTGTGGTGTGGAGAAGTCTCTTGAGAGTCCCTTGGACTGCAAGGAGATCCAACCAGTCCA  
BFF3 GCTTTTAATCTGTGGTGTGGAGAAGTCTCTTGAGAGTCCCTTGGACTGCAAGGAGATCCAACCAGTCCA

Long range primer F →

TCCTAAAGGAGATCAGTCCTGAATATTCATTGGAAGGACTGATGCTGAAGCGGAAACTCCAATACTTTGG  
TCCTAAAGGAGATCAGTCCTGAATATTCATTGGAAGGACTGATGCTGAAGCGGAAACTCCAATACTTTGG  
TCCTAAAGGAGATCAGTCCTGAATATTCATTGGAAGGACTGATGCTGAAGCGGAAACTCCAATACTTTGG  
TCCTAAAGGAGATCAGTCCTGAATATTCATTGGAAGGACTGATGCTGAAGCGGAAACTCCAATACTTTGG

CCACCTGATGGGAAGAGCTGACTCATTGAAAAGACCCTGATGCTGGGAAAGATTGAAGGCAGGAGGAGA  
CCACCTGATGGGAAGAGCTGACTCATTGAAAAGACCCTGATGCTGGGAAAGATTGAAGGCAGGAGGAGA  
CCACCTGATGGGAAGAGCTGACTCATTGAAAAGACCCTGATGCTGGGAAAGATTGAAGGCAGGAGGAGA  
CCACCTGATGGGAAGAGCTGACTCATTGAAAAGACCCTGATGCTGGGAAAGATTGAAGGCAGGAGGAGA

AGGGGACGACAGAGGATGAGATGGTTGGATGGCATCACTGTCTCGATGGACATGAGTTTTAGTAAGCTCC  
AGGGGACGACAGAGGATGAGATGGTTGGATGGCATCACTGTCTCGATGGACATGAGTTTTAGTAAGCTCC  
AGGGGACGACAGAGGATGAGATGGTTGGATGGCATCACTGTCTCGATGGACATGAGTTTTAGTAAGCTCC  
AGGGGACGACAGAGGATGAGATGGTTGGATGGCATCACTGTCTCGATGGACATGAGTTTTAGTAAGCTCC

5' junction primer F →

GGGAGTTGATGGTGGACAGGGAAGTCTGGCTGTAGTCCAGGGGGTGGCAAAGAGTTGGACACGACTGAGC  
GGGAGTTGATGGTGGACAGGGAAGTCTGGCTGTAGTCCAGGGGGTGGCAAAGAGTTGGACACGACTGAGC  
GGGAGTTGATGGTGGACAGGGAAGTCTGGCTGTAGTCCAGGGGGTGGCAAAGAGTTGGACACGACTGAGC  
GGGAGTTGATGGTGGACAGGGAAGTCTGGCTGTAGTCCAGGGGGTGGCAAAGAGTTGGACACGACTGAGC

← Left homology arm (542 bp)

GTCTGAACTGAACTGAGCTGTGGGCTCCCTGTTGTGAATTCTATTGAAAATGATGAGCCTTAGGCTGGAG  
GTCTGAACTGAACTGAGCTGTGGGCTCCCTGTTGTGAATTCTATTGAAAATGATGAGCCTTAGGCTGGAG  
GTCTGAACTGAACTGAGCTGTGGGCTCCCTGTTGTGAATTCTATTGAAAATGATGAGCCTTAGGCTGGAG  
GTCTGAACTGAACTGAGCTGTGGGCTCCCTGTTGTGAATTCTATTGAAAATGATGAGCCTTAGGCTGGAG

---

AAGACTCTTGAGAGTCCCATGGACTGCAAGGAGATCCAACCAGTCCATTCTAAAGGAGATCAGTCCTGGG  
AAGACTCTTGAGAGTCCCATGGACTGCAAGGAGATCCAACCAGTCCATTCTAAAGGAGATCAGTCCTGGG  
AAGACTCTTGAGAGTCCCATGGACTGCAAGGAGATCCAACCAGTCCATTCTAAAGGAGATCAGTCCTGGG  
AAGACTCTTGAGAGTCCCATGGACTGCAAGGAGATCCAACCAGTCCATTCTAAAGGAGATCAGTCCTGGG

---

TGTTCTTTGGAAGGAATGATGCTAAAGCTGAAACTCCAGTACTTTGGCCACCTCATGCGAAGAGTTGACT  
TGTTCTTTGGAAGGAATGATGCTAAAGCTGAAACTCCAGTACTTTGGCCACCTCATGCGAAGAGTTGACT  
TGTTCTTTGGAAGGAATGATGCTAAAGCTGAAACTCCAGTACTTTGGCCACCTCATGCGAAGAGTTGACT  
TGTTCTTTGGAAGGAATGATGCTAAAGCTGAAACTCCAGTACTTTGGCCACCTCATGCGAAGAGTTGACT

WT CATTGAAAAGACTCTGATGCTGGGAGGGATTGGGGCAGGAGGAGAAGGGGACGACAGAGGATGAGATG  
BFF1 CATTGAAAAGACTCTGATGCTGGGAGGGATTGGGGCAGGAGGAGAAGGGGACGACAGAGGATGAGATG  
BFF2 CATTGAAAAGACTCTGATGCTGGGAGGGATTGGGGCAGGAGGAGAAGGGGACGACAGAGGATGAGATG  
BFF3 CATTGAAAAGACTCTGATGCTGGGAGGGATTGGGGCAGGAGGAGAAGGGGACGACAGAGGATGAGATG

GCTGGATGGCATCACTGACTCAATGGACGTGAGTCTGAGTGAACCTCCGGGAGTTGGTGATGGACAGGGAG  
GCTGGATGGCATCACTGACTCAATGGACGTGAGTCTGAGTGAACCTCCGGGAGTTGGTGATGGACAGGGAG  
GCTGGATGGCATCACTGACTCAATGGACGTGAGTCTGAGTGAACCTCCGGGAGTTGGTGATGGACAGGGAG  
GCTGGATGGCATCACTGACTCAATGGACGTGAGTCTGAGTGAACCTCCGGGAGTTGGTGATGGACAGGGAG

GCCTGGCGTGCTACAATTCATGGGGTCGCAAAGAGTCAGACACGACTGAACGACTGAACTGAACTGAACT  
GCCTGGCGTGCTACAATTCATGGGGTCGCAAAGAGTCAGACACGACTGAACGACTGAACTGAACTGAACT  
GCCTGGCGTGCTACAATTCATGGGGTCGCAAAGAGTCAGACACGACTGAACGACTGAACTGAACTGAACT  
GCCTGGCGTGCTACAATTCATGGGGTCGCAAAGAGTCAGACACGACTGAACGACTGAACTGAACTGAACT

Left homology arm (542 bp)

GAACTGAAGGCTCAGGGGTTACCTCCGCCTCTGTAGGTACAGAAGCCATTCACAGACCCTGAGAAGTCA  
GAACTGAAGGCTCAGGGGTTACCTCCGCCTCTGTAGGTACAGAAGCCATTCACAGACCCTGAGAAGTCA  
GAACTGAAGGCTCAGGGGTTACCTCCGCCTCTGTAGGTACAGAAGCCATTCACAGACCCTGAGAAGTCA  
GAACTGAAGGCTCAGGGGTTACCTCCGCCTCTGTAGGTACAGAAGCCATTCACAGACCCTGAGAAGTCA

5' Genome walking SP3

XhoI

GAACCCTTTTCTTAACATTCCATCTCTAGAGCAAGCGCTTTTCCCAGGGTGAGGGATTATGCACGTGAG  
GAACCCTTTTCTTAACATTCCATCTCTAGAGCAAGCGCTTTTCCCAGGGTGAGGGATTATGCACCTCGA  
GAACCCTTTTCTTAACATTCCATCTCTAGAGCAAGCGCTTTTCCCAGGGTGAGGGATTATGCACCTCGA  
GAACCCTTTTCTTAACATTCCATCTCTAGAGCAAGCGCTTTTCCCAGGGTGAGGGATTATGCACCTCGA

LoxP

TALEN-L

TALEN-R

AGACTGACCCTTAGGTTCTCACGAATCCTTATGGAACACACATACCATCCAACCTTTCGCGTCTGCTCTT  
GATAACTTCGTATAATGTATGCTATACGAAGTTATAGTCGAGGGCCCCTGCAGGTCAATTCTACGGGTA  
GATAACTTCGTATAATGTATGCTATACGAAGTTATAGTCGAGGGCCCCTGCAGGTCAATTCTACGGGTA  
GATAACTTCGTATAATGTATGCTATACGAAGTTATAGTCGAGGGCCCCTGCAGGTCAATTCTACGGGTA

pGK-NEO-pT cassette (1803 bp)

CAGT-----  
GGGGAGGCGCTTTTCCCAAGGCAGTCTGGAGCATGCGCTTTAGCAGCCCCGCTGGCACTTGGCGCTACAC  
GGGGAGGCGCTTTTCCCAAGGCAGTCTGGAGCATGCGCTTTAGCAGCCCCGCTGGCACTTGGCGCTACAC  
GGGGAGGCGCTTTTCCCAAGGCAGTCTGGAGCATGCGCTTTAGCAGCCCCGCTGGCACTTGGCGCTACAC

5' Genome walking SP2

AAGTGGCCTCTGGCCTCGCACACATTCACATCCACCGGTAGCGCCAACCGGCTCCGTTCTTTGGTGGCC  
AAGTGGCCTCTGGCCTCGCACACATTCACATCCACCGGTAGCGCCAACCGGCTCCGTTCTTTGGTGGCC  
AAGTGGCCTCTGGCCTCGCACACATTCACATCCACCGGTAGCGCCAACCGGCTCCGTTCTTTGGTGGCC

WT  
-----  
BFF1 CCTTCGCGCCACCTTCTACTCCTCCCCTAGTCAGGAAGTTCCCCCGCCCCGCAGCTCGCGTCGTGCAG  
BFF2 CCTTCGCGCCACCTTCTACTCCTCCCCTAGTCAGGAAGTTCCCCCGCCCCGCAGCTCGCGTCGTGCAG  
BFF3 CCTTCGCGCCACCTTCTACTCCTCCCCTAGTCAGGAAGTTCCCCCGCCCCGCAGCTCGCGTCGTGCAG

-----  
GACGTGACAAATGGAAGTAGCACGTCTCACTAGTCTCGTGCAGATGGACAGCACCGCTGAGCAATGGAAG  
GACGTGACAAATGGAAGTAGCACGTCTCACTAGTCTCGTGCAGATGGACAGCACCGCTGAGCAATGGAAG  
GACGTGACAAATGGAAGTAGCACGTCTCACTAGTCTCGTGCAGATGGACAGCACCGCTGAGCAATGGAAG

← 5' Genome walking SP1

-----  
CGGGTAGGCCTTTGGGGCAGCGGCAATAGCAGCTTTGCTCCTTCGCTTTCTGGGCTCAGAGGCTGGGAA  
CGGGTAGGCCTTTGGGGCAGCGGCAATAGCAGCTTTGCTCCTTCGCTTTCTGGGCTCAGAGGCTGGGAA  
CGGGTAGGCCTTTGGGGCAGCGGCAATAGCAGCTTTGCTCCTTCGCTTTCTGGGCTCAGAGGCTGGGAA

-----  
GGGGTGGGTCCGGGGCGGGCTCAGGGGCGGGCTCAGGGGCGGGCGGGCGGAAGGTCTCCCGAGGCC  
GGGGTGGGTCCGGGGCGGGCTCAGGGGCGGGCTCAGGGGCGGGCGGGCGGAAGGTCTCCCGAGGCC  
GGGGTGGGTCCGGGGCGGGCTCAGGGGCGGGCTCAGGGGCGGGCGGGCGGAAGGTCTCCCGAGGCC

pGK-NEO-pT cassette (1803 bp)

-----  
CGGCATTCTCGCACGCTTCAAAGCGCACGTCTGCCGCGCTGTTCTCCTCTTCTCATCTCCGGGCCTTT  
CGGCATTCTCGCACGCTTCAAAGCGCACGTCTGCCGCGCTGTTCTCCTCTTCTCATCTCCGGGCCTTT  
CGGCATTCTCGCACGCTTCAAAGCGCACGTCTGCCGCGCTGTTCTCCTCTTCTCATCTCCGGGCCTTT

-----  
CGACCTGCAGCCAATATGGGATCGGCCATTGAACAAGATGGATTGCACGCAGTTCTCCGGCCGCTTGGG  
CGACCTGCAGCCAATATGGGATCGGCCATTGAACAAGATGGATTGCACGCAGTTCTCCGGCCGCTTGGG  
CGACCTGCAGCCAATATGGGATCGGCCATTGAACAAGATGGATTGCACGCAGTTCTCCGGCCGCTTGGG

-----  
TGGAGAGGCTATTCGGCTATGACTGGGCACAACAGACAATCGGCTGCTCTGATGCCGCCGTGTTCCGGCT  
TGGAGAGGCTATTCGGCTATGACTGGGCACAACAGACAATCGGCTGCTCTGATGCCGCCGTGTTCCGGCT  
TGGAGAGGCTATTCGGCTATGACTGGGCACAACAGACAATCGGCTGCTCTGATGCCGCCGTGTTCCGGCT

-----  
GTCAGCGCAGGGGCGCCCGTTCTTTTTGTCAAGACCGACCTGTCCGGTGCCCTGAATGAACTGCAGGAC  
GTCAGCGCAGGGGCGCCCGTTCTTTTTGTCAAGACCGACCTGTCCGGTGCCCTGAATGAACTGCAGGAC  
GTCAGCGCAGGGGCGCCCGTTCTTTTTGTCAAGACCGACCTGTCCGGTGCCCTGAATGAACTGCAGGAC

WT  
-----  
BFF1 GAGGCAGCGGGCTATCGTGGCTGGCCACGACGGGGCTTCCTTGCGCAGCTGTGCTCGACGTTGTCACTG  
BFF2 GAGGCAGCGGGCTATCGTGGCTGGCCACGACGGGGCTTCCTTGCGCAGCTGTGCTCGACGTTGTCACTG  
BFF3 GAGGCAGCGGGCTATCGTGGCTGGCCACGACGGGGCTTCCTTGCGCAGCTGTGCTCGACGTTGTCACTG

5' junction primer R  
←

-----  
AAGCGGGAAGGGACTGGCTGCTATTGGGCGAAGTGCCGGGGCAGGATCTCCTGTCATCTCACCTTGCTCC  
AAGCGGGAAGGGACTGGCTGCTATTGGGCGAAGTGCCGGGGCAGGATCTCCTGTCATCTCACCTTGCTCC  
AAGCGGGAAGGGACTGGCTGCTATTGGGCGAAGTGCCGGGGCAGGATCTCCTGTCATCTCACCTTGCTCC

-----  
TGCCGAGAAAGTATCCATCATGGCTGATGCAATGCGGGGGCTGCATACGCTTGATCCGGCTACCTGCCCA  
TGCCGAGAAAGTATCCATCATGGCTGATGCAATGCGGGGGCTGCATACGCTTGATCCGGCTACCTGCCCA  
TGCCGAGAAAGTATCCATCATGGCTGATGCAATGCGGGGGCTGCATACGCTTGATCCGGCTACCTGCCCA

-----  
TTCGACCACCAAGCGAAACATCGCATCGAGCGAGCAGTACTCGGATGGAAGCCGGTCTTGTCGATCAGG  
TTCGACCACCAAGCGAAACATCGCATCGAGCGAGCAGTACTCGGATGGAAGCCGGTCTTGTCGATCAGG  
TTCGACCACCAAGCGAAACATCGCATCGAGCGAGCAGTACTCGGATGGAAGCCGGTCTTGTCGATCAGG

pGK-NEO-pT cassette (1803 bp)

-----  
ATGATCTGGACGAAGAGCATCAGGGGCTCGCGCCAGCCGAAGTTCGCCAGGCTCAAGGCGCGCATGCC  
ATGATCTGGACGAAGAGCATCAGGGGCTCGCGCCAGCCGAAGTTCGCCAGGCTCAAGGCGCGCATGCC  
ATGATCTGGACGAAGAGCATCAGGGGCTCGCGCCAGCCGAAGTTCGCCAGGCTCAAGGCGCGCATGCC

-----  
CGACGGCGATGATCTCGTCGTGACCCATGGCGATGCCTGCTTGCCGAATATCATGGTGGAAAATGGCCGC  
CGACGGCGATGATCTCGTCGTGACCCATGGCGATGCCTGCTTGCCGAATATCATGGTGGAAAATGGCCGC  
CGACGGCGATGATCTCGTCGTGACCCATGGCGATGCCTGCTTGCCGAATATCATGGTGGAAAATGGCCGC

-----  
TTTTCTGGATTTCATCGACTGTGGCCGGCTGGGTGTGGCGGACCGCTATCAGGACATAGCGTTGGCTACCC  
TTTTCTGGATTTCATCGACTGTGGCCGGCTGGGTGTGGCGGACCGCTATCAGGACATAGCGTTGGCTACCC  
TTTTCTGGATTTCATCGACTGTGGCCGGCTGGGTGTGGCGGACCGCTATCAGGACATAGCGTTGGCTACCC

-----  
GTGATATTGCTGAAGAGCTTGGCGGCGAATGGGCTGACCGCTTCCTCGTGCTTTACGGTATCGCCGCTCC  
GTGATATTGCTGAAGAGCTTGGCGGCGAATGGGCTGACCGCTTCCTCGTGCTTTACGGTATCGCCGCTCC  
GTGATATTGCTGAAGAGCTTGGCGGCGAATGGGCTGACCGCTTCCTCGTGCTTTACGGTATCGCCGCTCC

WT  
BFF1 CGATTTCGACGGCATCGCCTTCTATCGCCTTCTTGACGAGTTCTTCTGAGGGGATCGATCCGTCCTGTAA  
BFF2 CGATTTCGACGGCATCGCCTTCTATCGCCTTCTTGACGAGTTCTTCTGAGGGGATCGATCCGTCCTGTAA  
BFF3 CGATTTCGACGGCATCGCCTTCTATCGCCTTCTTGACGAGTTCTTCTGAGGGGATCGATCCGTCCTGTAA

GTCTGCAGAAATTGATGATCTATTAACAATAAAGATGTCCACTAAAATGGAAGTTTTTCCTGTCATACT  
GTCTGCAGAAATTGATGATCTATTAACAATAAAGATGTCCACTAAAATGGAAGTTTTTCCTGTCATACT  
GTCTGCAGAAATTGATGATCTATTAACAATAAAGATGTCCACTAAAATGGAAGTTTTTCCTGTCATACT

TTGTTAAGAAGGGTGAGAACAGAGTACCTACATTTTGAATGGAAGGATTGGAGCTACGGGGGTGGGGTG  
TTGTTAAGAAGGGTGAGAACAGAGTACCTACATTTTGAATGGAAGGATTGGAGCTACGGGGGTGGGGTG  
TTGTTAAGAAGGGTGAGAACAGAGTACCTACATTTTGAATGGAAGGATTGGAGCTACGGGGGTGGGGTG

GGGTGGGATTAGATAAATGCCTGCTCTTTACTGAAGGCTCTTTACTATTGCTTTATGATAATGTTTCATA  
GGGTGGGATTAGATAAATGCCTGCTCTTTACTGAAGGCTCTTTACTATTGCTTTATGATAATGTTTCATA  
GGGTGGGATTAGATAAATGCCTGCTCTTTACTGAAGGCTCTTTACTATTGCTTTATGATAATGTTTCATA

GTTGGATATCATAATTTAAACAAGCAAAACCAAATTAAGGGCCAGCTCATTCCCTCCCACTCATGATCTAT  
GTTGGATATCATAATTTAAACAAGCAAAACCAAATTAAGGGCCAGCTCATTCCCTCCCACTCATGATCTAT  
GTTGGATATCATAATTTAAACAAGCAAAACCAAATTAAGGGCCAGCTCATTCCCTCCCACTCATGATCTAT

AGATCTATAGATCTCTCGTGGGATCATTGTTTTCTCTTGATTCCCACTTTGTGTTCTAAGTACTGTGG  
AGATCTATAGATCTCTCGTGGGATCATTGTTTTCTCTTGATTCCCACTTTGTGTTCTAAGTACTGTGG  
AGATCTATAGATCTCTCGTGGGATCATTGTTTTCTCTTGATTCCCACTTTGTGTTCTAAGTACTGTGG

pGK-NEO-pT cassette (1803 bp)

TTTCCAAATGTGTCAGTTTCATAGCCTGAAGAACGAGATCAGCAGCCTCTGTTCCACATACACTTCATTC  
TTTCCAAATGTGTCAGTTTCATAGCCTGAAGAACGAGATCAGCAGCCTCTGTTCCACATACACTTCATTC  
TTTCCAAATGTGTCAGTTTCATAGCCTGAAGAACGAGATCAGCAGCCTCTGTTCCACATACACTTCATTC

LoxP

TCAGTATTGTTTTGCCAAGTTCTAATTCATCAGAAGCTATAACTTCGTATAATGTATGCTATACGAAGT  
TCAGTATTGTTTTGCCAAGTTCTAATTCATCAGAAGCTATAACTTCGTATAATGTATGCTATACGAAGT  
TCAGTATTGTTTTGCCAAGTTCTAATTCATCAGAAGCTATAACTTCGTATAATGTATGCTATACGAAGT

← SaI I ← MSR1 promoter (972 bp)  
 WT →  
 BFF1 TATGACTCTAGAGTCGACGGACCATCTCTTGATAGAAAAGTAGGATCCCTCCCTCTTTGAGCACCATGAAG  
 BFF2 TATGACTCTAGAGTCGACGGACCATCTCTTGATAGAAAAGTAGGATCCCTCCCTCTTTGAGCACCATGAAG  
 BFF3 TATGACTCTAGAGTCGACGGACCATCTCTTGATAGAAAAGTAGGATCCCTCCCTCTTTGAGCACCATGAAG

TGCCCATGAAATATAAACTAAACACTTTTCCCAAAAAGATTCAAATCTAAAAATTAGCTCATTAGTATAT  
 TGCCCATGAAATATAAACTAAACACTTTTCCCAAAAAGATTCAAATCTAAAAATTAGCTCATTAGTATAT  
 TGCCCATGAAATATAAACTAAACACTTTTCCCAAAAAGATTCAAATCTAAAAATTAGCTCATTAGTATAT

TTTTTACATGTCTTATTGGAAGTGAATGTGATTAATAAATGAGATTAAAAAATATGTAAAACCTCTGA  
 TTTTTACATGTCTTATTGGAAGTGAATGTGATTAATAAATGAGATTAAAAAATATGTAAAACCTCTGA  
 TTTTTACATGTCTTATTGGAAGTGAATGTGATTAATAAATGAGATTAAAAAATATGTAAAACCTCTGA

CAGGTATGGAAGATGAAAGTCATTCCTTTGTTCTGATCCCATGCCGAGACCCCTTTCTTCTATTATACT  
 CAGGTATGGAAGATGAAAGTCATTCCTTTGTTCTGATCCCATGCCGAGACCCCTTTCTTCTATTATACT  
 CAGGTATGGAAGATGAAAGTCATTCCTTTGTTCTGATCCCATGCCGAGACCCCTTTCTTCTATTATACT

TCTCAGGAAATAAATAACTTTTTAGATGCTCAAAGGGATCTACAGAAATTGCTAACATCACTATAGACAG  
 TCTCAGGAAATAAATAACTTTTTAGATGCTCAAAGGGATCTACAGAAATTGCTAACATCACTATAGACAG  
 TCTCAGGAAATAAATAACTTTTTAGATGCTCAAAGGGATCTACAGAAATTGCTAACATCACTATAGACAG

MSR1 promoter (972 bp)

AGCTGAAGTGAGCAGTAAGGGATTGCTGCTTTTACTTGGTGGGTATCCTTTCCTACTCTGCTTTGTGTTT  
 AGCTGAAGTGAGCAGTAAGGGATTGCTGCTTTTACTTGGTGGGTATCCTTTCCTACTCTGCTTTGTGTTT  
 AGCTGAAGTGAGCAGTAAGGGATTGCTGCTTTTACTTGGTGGGTATCCTTTCCTACTCTGCTTTGTGTTT

GAAGCTAGAGATAAGGGATCTAGGGAAAAGGATTGAGAAAACAAATCACTTAGACATAGAGTCTTCCCT  
 GAAGCTAGAGATAAGGGATCTAGGGAAAAGGATTGAGAAAACAAATCACTTAGACATAGAGTCTTCCCT  
 GAAGCTAGAGATAAGGGATCTAGGGAAAAGGATTGAGAAAACAAATCACTTAGACATAGAGTCTTCCCT

CAAGGTTATACAGTATGAAAGATCATGAGTATTAGTGAAGATATTGAGATTAATGGAAGATTAATAGGA  
 CAAGGTTATACAGTATGAAAGATCATGAGTATTAGTGAAGATATTGAGATTAATGGAAGATTAATAGGA  
 CAAGGTTATACAGTATGAAAGATCATGAGTATTAGTGAAGATATTGAGATTAATGGAAGATTAATAGGA

WT  
BFF1 ATGAGAATATTATAGAAAAGCAGACCTATCTTACAAAAAGGAAAAGATTAATCTTCCATATGTTATGCACG  
BFF2 ATGAGAATATTATAGAAAAGCAGACCTATCTTACAAAAAGGAAAAGATTAATCTTCCATATGTTATGCACG  
BFF3 ATGAGAATATTATAGAAAAGCAGACCTATCTTACAAAAAGGAAAAGATTAATCTTCCATATGTTATGCACG

CTGTTACAATAACCCCAATTGTTTTTCATTTGACTTCTCTTTTTCTTCTGTAATGTCCTAGATGGAAAGA  
CTGTTACAATAACCCCAATTGTTTTTCATTTGACTTCTCTTTTTCTTCTGTAATGTCCTAGATGGAAAGA  
CTGTTACAATAACCCCAATTGTTTTTCATTTGACTTCTCTTTTTCTTCTGTAATGTCCTAGATGGAAAGA

GGAAAGAGTTATCTGACAAAATTTAGATTCTGCAAACCTTGTCACCTGAGAAGAGTACTATTGAAATACGCT  
GGAAAGAGTTATCTGACAAAATTTAGATTCTGCAAACCTTGTCACCTGAGAAGAGTACTATTGAAATACGCT  
GGAAAGAGTTATCTGACAAAATTTAGATTCTGCAAACCTTGTCACCTGAGAAGAGTACTATTGAAATACGCT

GTTAAGAAAGATTTTCAACATACAAATGTGTCATTTCTTTCTTCGTGTGCTGTGCTGAAATATTATGTG  
GTTAAGAAAGATTTTCAACATACAAATGTGTCATTTCTTTCTTCGTGTGCTGTGCTGAAATATTATGTG  
GTTAAGAAAGATTTTCAACATACAAATGTGTCATTTCTTTCTTCGTGTGCTGTGCTGAAATATTATGTG

ATAAAGGTTTTAGGTTTCAATTGTTACAAGAGGGAAGTAGATAAATCGGTGCTGCCGTCTTTAGGACATA  
ATAAAGGTTTTAGGTTTCAATTGTTACAAGAGGGAAGTAGATAAATCGGTGCTGCCGTCTTTAGGACATA  
ATAAAGGTTTTAGGTTTCAATTGTTACAAGAGGGAAGTAGATAAATCGGTGCTGCCGTCTTTAGGACATA

MSR1 promoter (972 bp)

TGGTAAAAGTTTTACTTGTGTTTTCTCCAAATTGCTTCTGTTGAATATATGGGTCTACTCTGTATTTTT  
TGGTAAAAGTTTTACTTGTGTTTTCTCCAAATTGCTTCTGTTGAATATATGGGTCTACTCTGTATTTTT  
TGGTAAAAGTTTTACTTGTGTTTTCTCCAAATTGCTTCTGTTGAATATATGGGTCTACTCTGTATTTTT

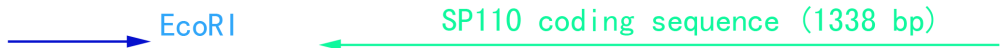

GTGTGTCTACGAATTCGCCACCATGTTCACTCTGACCAAAGCCTTGGAAAAGGCTCTTCTCCAGCATTTT  
GTGTGTCTACGAATTCGCCACCATGTTCACTCTGACCAAAGCCTTGGAAAAGGCTCTTCTCCAGCATTTT  
GTGTGTCTACGAATTCGCCACCATGTTCACTCTGACCAAAGCCTTGGAAAAGGCTCTTCTCCAGCATTTT

ATATACATGAAGGTGAACATCGCCTATGCCATCAACAAGCCATTCCCCTTCTTCGAAGCGCTCCGGGACA  
ATATACATGAAGGTGAACATCGCCTATGCCATCAACAAGCCATTCCCCTTCTTCGAAGCGCTCCGGGACA  
ATATACATGAAGGTGAACATCGCCTATGCCATCAACAAGCCATTCCCCTTCTTCGAAGCGCTCCGGGACA

WT  
BFF1 ATTCCTTCATCACTGAGAGAATGTACAAGGAATCTCTGGAAGCCTGTCAAAATCTGGTCCCTCTGTCCAA  
BFF2 ATTCCTTCATCACTGAGAGAATGTACAAGGAATCTCTGGAAGCCTGTCAAAATCTGGTCCCTCTGTCCAA  
BFF3 ATTCCTTCATCACTGAGAGAATGTACAAGGAATCTCTGGAAGCCTGTCAAAATCTGGTCCCTCTGTCCAA

AGTGGTGACAATATTCTCACCAGTCTGGAGCAGACTTTCCACCGTCAGTGCTGCTGACGTTGTTTCAGC  
AGTGGTGACAATATTCTCACCAGTCTGGAGCAGACTTTCCACCGTCAGTGCTGCTGACGTTGTTTCAGC  
AGTGGTGACAATATTCTCACCAGTCTGGAGCAGACTTTCCACCGTCAGTGCTGCTGACGTTGTTTCAGC

AAGGTCAACCTCCGGGAATACCCAGCCTGGTGGCAATTTTCAGAAGCTTCAGAAACGTTGGTTATACCT  
AAGGTCAACCTCCGGGAATACCCAGCCTGGTGGCAATTTTCAGAAGCTTCAGAAACGTTGGTTATACCT  
AAGGTCAACCTCCGGGAATACCCAGCCTGGTGGCAATTTTCAGAAGCTTCAGAAACGTTGGTTATACCT

SP110 coding sequence (1338 bp)

ACGAAGAGAAAAACAGACCCCCACTGACCCTGCTTGAAGACCTGGCCAACCCAGCAGAAGGGTGCTCCCT  
ACGAAGAGAAAAACAGACCCCCACTGACCCTGCTTGAAGACCTGGCCAACCCAGCAGAAGGGTGCTCCCT  
ACGAAGAGAAAAACAGACCCCCACTGACCCTGCTTGAAGACCTGGCCAACCCAGCAGAAGGGTGCTCCCT

3' Genome walking SP1

TCAGACACTGCTGCCACCACCCGACCCAGATA TCGGTGCCAAGTCACTGTCTCTCAGCACCCGAGAGTC  
TCAGACACTGCTGCCACCACCCGACCCAGATA TCGGTGCCAAGTCACTGTCTCTCAGCACCCGAGAGTC  
TCAGACACTGCTGCCACCACCCGACCCAGATA TCGGTGCCAAGTCACTGTCTCTCAGCACCCGAGAGTC

TGTGACCCAGAGCAACCGCACAGCCAATCATTGAGATCCTGGATGAGCAGCCAGTCCTTCTCCCGAG  
TGTGACCCAGAGCAACCGCACAGCCAATCATTGAGATCCTGGATGAGCAGCCAGTCCTTCTCCCGAG  
TGTGACCCAGAGCAACCGCACAGCCAATCATTGAGATCCTGGATGAGCAGCCAGTCCTTCTCCCGAG

3' junction primer F

CTGTGCCTCTCCTTGGCTGCATTAGGAAGGAAAAACCACTCCAGTGTCTCCAGAGATCACCAGAGAAA  
CTGTGCCTCTCCTTGGCTGCATTAGGAAGGAAAAACCACTCCAGTGTCTCCAGAGATCACCAGAGAAA  
CTGTGCCTCTCCTTGGCTGCATTAGGAAGGAAAAACCACTCCAGTGTCTCCAGAGATCACCAGAGAAA

3' Genome walking SP2

AGATAAGGAAGACTCTCGAGAGATGCCCCACAGTCCCTCAGGACCCGAGTCAGTGGTAAAAGATGACTCT  
AGATAAGGAAGACTCTCGAGAGATGCCCCACAGTCCCTCAGGACCCGAGTCAGTGGTAAAAGATGACTCT  
AGATAAGGAAGACTCTCGAGAGATGCCCCACAGTCCCTCAGGACCCGAGTCAGTGGTAAAAGATGACTCT



WT  
BFF1  
BFF2  
BFF3

→  
-----  
CCAGCAGCAAATGACCTGGAAATGGCCAGGGAAGTACCCTGCACACCTGCAAACAAGAAAGCAAGAAGAA  
CCAGCAGCAAATGACCTGGAAATGGCCAGGGAAGTACCCTGCACACCTGCAAACAAGAAAGCAAGAAGAA  
CCAGCAGCAAATGACCTGGAAATGGCCAGGGAAGTACCCTGCACACCTGCAAACAAGAAAGCAAGAAGAA

3' Genome walking SP3

-----  
AAAAACGTCCGAACTGGTCAAATTCAAAAGAAGACGGCAGAAAAAAAAGCCCGTCAAGATGAGATGAT  
AAAAACGTCCGAACTGGTCAAATTCAAAAGAAGACGGCAGAAAAAAAAGCCCGTCAAGATGAGATGAT  
AAAAACGTCCGAACTGGTCAAATTCAAAAGAAGACGGCAGAAAAAAAAGCCCGTCAAGATGAGATGAT

→  
-----  
GGGAGTGGCCTCACCTGGACATGGAGTTCAAGAGAAGCTCAAGGCAGTGAGCAGGAGGACTTTGTGGAA  
GGGAGTGGCCTCACCTGGACATGGAGTTCAAGAGAAGCTCAAGGCAGTGAGCAGGAGGACTTTGTGGAA  
GGGAGTGGCCTCACCTGGACATGGAGTTCAAGAGAAGCTCAAGGCAGTGAGCAGGAGGACTTTGTGGAA

-----  
GATGACTCATCTACGAACGTGAAGGAGGTGACCAAGACACAGAGAACAAGGATGAGGCGTGCCAGACAT  
GATGACTCATCTACGAACGTGAAGGAGGTGACCAAGACACAGAGAACAAGGATGAGGCGTGCCAGACAT  
GATGACTCATCTACGAACGTGAAGGAGGTGACCAAGACACAGAGAACAAGGATGAGGCGTGCCAGACAT

SP110 coding sequence (1338 bp)

-----  
CCAATTCACAAGAGATCAGCAAAGAGGCATCAAAAACAAGTGGTAGAAAGAGGCCAGCACAGCACGAAG  
CCAATTCACAAGAGATCAGCAAAGAGGCATCAAAAACAAGTGGTAGAAAGAGGCCAGCACAGCACGAAG  
CCAATTCACAAGAGATCAGCAAAGAGGCATCAAAAACAAGTGGTAGAAAGAGGCCAGCACAGCACGAAG

-----  
AACCACACAAGTTCAGAGAAGACCAAGAATGACGCTGTGGATTTCTCTCCACACTCCCTGTGACCTGT  
AACCACACAAGTTCAGAGAAGACCAAGAATGACGCTGTGGATTTCTCTCCACACTCCCTGTGACCTGT  
AACCACACAAGTTCAGAGAAGACCAAGAATGACGCTGTGGATTTCTCTCCACACTCCCTGTGACCTGT

-----  
GGTAAGGCCAAAGGGACTTTGTTCCAAGAGAACTGAAGCAAGGAGCCTCAAAAAGTGCATTCAGAATG  
GGTAAGGCCAAAGGGACTTTGTTCCAAGAGAACTGAAGCAAGGAGCCTCAAAAAGTGCATTCAGAATG  
GGTAAGGCCAAAGGGACTTTGTTCCAAGAGAACTGAAGCAAGGAGCCTCAAAAAGTGCATTCAGAATG

-----  
AGGCAGGAGATTGGCTCACTGTAAGGAATTTTTAAATGAAGGGGAAGGGCCACATCAAAGACTGGAA  
AGGCAGGAGATTGGCTCACTGTAAGGAATTTTTAAATGAAGGGGAAGGGCCACATCAAAGACTGGAA  
AGGCAGGAGATTGGCTCACTGTAAGGAATTTTTAAATGAAGGGGAAGGGCCACATCAAAGACTGGAA

SP110 coding sequence (1338 bp)

WT  
BFF1 GGGCGTTATACGTTGTAACGGGGAGACATTAAGACATCTGGAGCAGAAAGGACTTTTGTTCCTTACCTCC  
BFF2 GGGCGTTATACGTTGTAACGGGGAGACATTAAGACATCTGGAGCAGAAAGGACTTTTGTTCCTTACCTCC  
BFF3 GGGCGTTATACGTTGTAACGGGGAGACATTAAGACATCTGGAGCAGAAAGGACTTTTGTTCCTTACCTCC

BamHI

AAGAGTAAACCTCAAAGAAGGGTGCCTAGGGATCCACCGGATCTAGATAACTGATCATAATCAGCCATA  
AAGAGTAAACCTCAAAGAAGGGTGCCTAGGGATCCACCGGATCTAGATAACTGATCATAATCAGCCATA  
AAGAGTAAACCTCAAAGAAGGGTGCCTAGGGATCCACCGGATCTAGATAACTGATCATAATCAGCCATA

CCACATTTGTAGAGGTTTTACTTGCTTTAAAAACCTCCACACCTCCCCTGAACCTGAAACATAAAAT  
CCACATTTGTAGAGGTTTTACTTGCTTTAAAAACCTCCACACCTCCCCTGAACCTGAAACATAAAAT  
CCACATTTGTAGAGGTTTTACTTGCTTTAAAAACCTCCACACCTCCCCTGAACCTGAAACATAAAAT

GAATGCAATTGTTGTTGTTAACTTGTTTATTGCAGCTTATAATGGTTACAAATAAAGCAATAGCATCACA  
GAATGCAATTGTTGTTGTTAACTTGTTTATTGCAGCTTATAATGGTTACAAATAAAGCAATAGCATCACA  
GAATGCAATTGTTGTTGTTAACTTGTTTATTGCAGCTTATAATGGTTACAAATAAAGCAATAGCATCACA

poly A (264 bp)

AATTTCAAAATAAAGCATTTTTTCACTGCATTCTAGTTGTGGTTTGTCCAAACTCATCAATGTATCTT  
AATTTCAAAATAAAGCATTTTTTCACTGCATTCTAGTTGTGGTTTGTCCAAACTCATCAATGTATCTT  
AATTTCAAAATAAAGCATTTTTTCACTGCATTCTAGTTGTGGTTTGTCCAAACTCATCAATGTATCTT

Right homology arm (505 bp)

GCACCTTTAGAAGGCAAAGGGAATGCCTGATGAAGGACACTGAAGGCCCTGCCCCAG  
AAGCGTAGCTAGCGCACTTTAGAAGGCAAAGGGAATGCCTGATGAAGGACACTGAAGGCCCTGCCCCAG  
AAGCGTAGCTAGCGCACTTTAGAAGGCAAAGGGAATGCCTGATGAAGGACACTGAAGGCCCTGCCCCAG  
AAGCGTAGCTAGCGCACTTTAGAAGGCAAAGGGAATGCCTGATGAAGGACACTGAAGGCCCTGCCCCAG

GCACCATCATCCCCACCCTGCAGCAAGCCCGGCCTCAGGGGCACAGCTGGGAACCAGGGCTTCTGAGT  
GCACCATCATCCCCACCCTGCAGCAAGCCCGGCCTCAGGGGCACAGCTGGGAACCAGGGCTTCTGAGT  
GCACCATCATCCCCACCCTGCAGCAAGCCCGGCCTCAGGGGCACAGCTGGGAACCAGGGCTTCTGAGT  
GCACCATCATCCCCACCCTGCAGCAAGCCCGGCCTCAGGGGCACAGCTGGGAACCAGGGCTTCTGAGT

AAGGGTCTCTCCAGGGTTGTGAGACTCAGGCACAAGCAGGAGGGTTTGCGGCACTGTGTCCTACCACCCC  
AAGGGTCTCTCCAGGGTTGTGAGACTCAGGCACAAGCAGGAGGGTTTGCGGCACTGTGTCCTACCACCCC  
AAGGGTCTCTCCAGGGTTGTGAGACTCAGGCACAAGCAGGAGGGTTTGCGGCACTGTGTCCTACCACCCC  
AAGGGTCTCTCCAGGGTTGTGAGACTCAGGCACAAGCAGGAGGGTTTGCGGCACTGTGTCCTACCACCCC

WT CTGACCTTTATTGTGTGCACCAGCCTGGGTTTCCCTCCCGCCTTGGGCCCTCTGTTCTCTCATGTGT  
BFF1 CTGACCTTTATTGTGTGCACCAGCCTGGGTTTCCCTCCCGCCTTGGGCCCTCTGTTCTCTCATGTGT  
BFF2 CTGACCTTTATTGTGTGCACCAGCCTGGGTTTCCCTCCCGCCTTGGGCCCTCTGTTCTCTCATGTGT  
BFF3 CTGACCTTTATTGTGTGCACCAGCCTGGGTTTCCCTCCCGCCTTGGGCCCTCTGTTCTCTCATGTGT

GTCTCCCAATCCAGCCAACTCTCCTCGGTTCTCTGGGGCTGTGGAGCAACGCTCTGCTGGCCACTCGGTT  
GTCTCCCAATCCAGCCAACTCTCCTCGGTTCTCTGGGGCTGTGGAGCAACGCTCTGCTGGCCACTCGGTT  
GTCTCCCAATCCAGCCAACTCTCCTCGGTTCTCTGGGGCTGTGGAGCAACGCTCTGCTGGCCACTCGGTT  
GTCTCCCAATCCAGCCAACTCTCCTCGGTTCTCTGGGGCTGTGGAGCAACGCTCTGCTGGCCACTCGGTT

TCCTCTACACCCATGGTGTGGCTTGCATCCTTGTGGGACTCTGTTCCCTCCCTGGTTCGTGTTTATCCG  
TCCTCTACACCCATGGTGTGGCTTGCATCCTTGTGGGACTCTGTTCCCTCCCTGGTTCGTGTTTATCCG  
TCCTCTACACCCATGGTGTGGCTTGCATCCTTGTGGGACTCTGTTCCCTCCCTGGTTCGTGTTTATCCG  
TCCTCTACACCCATGGTGTGGCTTGCATCCTTGTGGGACTCTGTTCCCTCCCTGGTTCGTGTTTATCCG

Right homology arm (505 bp)

AGACACTTATCCTCAGCCTGCTCTTACGCACTTCTTGGGTGCAGGCTCTTTCTCCTCCTCCCTATTGGTC  
AGACACTTATCCTCAGCCTGCTCTTACGCACTTCTTGGGTGCAGGCTCTTTCTCCTCCTCCCTATTGGTC  
AGACACTTATCCTCAGCCTGCTCTTACGCACTTCTTGGGTGCAGGCTCTTTCTCCTCCTCCCTATTGGTC  
AGACACTTATCCTCAGCCTGCTCTTACGCACTTCTTGGGTGCAGGCTCTTTCTCCTCCTCCCTATTGGTC

TTTGGGCCAACTGGGATCTCATGAAGAATCTTTGTTTGTCCCATGGATGTCTGTAGAGCTGTGGGCATAC  
TTTGGGCCAACTGGGATCTCATGAAGAATCTTTGTTTGTCCCATGGATGTCTGTAGAGCTGTGGGCATAC  
TTTGGGCCAACTGGGATCTCATGAAGAATCTTTGTTTGTCCCATGGATGTCTGTAGAGCTGTGGGCATAC  
TTTGGGCCAACTGGGATCTCATGAAGAATCTTTGTTTGTCCCATGGATGTCTGTAGAGCTGTGGGCATAC

3' junction primer R

AGAGCCATGGCAGAGGGCACAGCCCCAGGACAGGACTGCTGGTTGCCGAGACAAGGCTTTTTTATGGAAG  
AGAGCCATGGCAGAGGGCACAGCCCCAGGACAGGACTGCTGGTTGCCGAGACAAGGCTTTTTTATGGAAG  
AGAGCCATGGCAGAGGGCACAGCCCCAGGACAGGACTGCTGGTTGCCGAGACAAGGCTTTTTTATGGAAG  
AGAGCCATGGCAGAGGGCACAGCCCCAGGACAGGACTGCTGGTTGCCGAGACAAGGCTTTTTTATGGAAG

CAGACATAGCTGGTGCCAGTAGCCCTGCAGGGGTACCTGCCATAGTTGAATTCTGAAGGCCCTGCTT  
CAGACATAGCTGGTGCCAGTAGCCCTGCAGGGGTACCTGCCATAGTTGAATTCTGAAGGCCCTGCTT  
CAGACATAGCTGGTGCCAGTAGCCCTGCAGGGGTACCTGCCATAGTTGAATTCTGAAGGCCCTGCTT  
CAGACATAGCTGGTGCCAGTAGCCCTGCAGGGGTACCTGCCATAGTTGAATTCTGAAGGCCCTGCTT

Long range primer R

CTCTGAATGTCCCTGCAGACCTGGCTCCTGGTCTTGGGCATGTGGGGCCATGGCCAGTGTGTGCCCTCT  
CTCTGAATGTCCCTGCAGACCTGGCTCCTGGTCTTGGGCATGTGGGGCCATGGCCAGTGTGTGCCCTCT  
CTCTGAATGTCCCTGCAGACCTGGCTCCTGGTCTTGGGCATGTGGGGCCATGGCCAGTGTGTGCCCTCT  
CTCTGAATGTCCCTGCAGACCTGGCTCCTGGTCTTGGGCATGTGGGGCCATGGCCAGTGTGTGCCCTCT

WT GGTCTTGAGTCGGGGCTTAGCCATGTAGCTATCCACTCTAGCCATTCCAGTATTCTTGCC  
BFF1 GGTCTTGAGTCGGGGCTTAGCCATGTAGCTATCCACTCTAGCCATTCCAGTATTCTTGCC  
BFF2 GGTCTTGAGTCGGGGCTTAGCCATGTAGCTATCCACTCTAGCCATTCCAGTATTCTTGCC  
BFF3 GGTCTTGAGTCGGGGCTTAGCCATGTAGCTATCCACTCTAGCCATTCCAGTATTCTTGCC
